# Supplementary material for: Analysis of recent lower stratospheric ozone trends in chemistry climate models
Source: Copernicus journal article supplement (doi:10.5194/acp-2020-947), 2020-10-12
Supplement: Supplementary file 1 [file acp-2020-947-supplement.pdf]

# Supplement of “Analysis of recent lower stratospheric ozone trends in chemistry climate models” by Dietmueller et al.

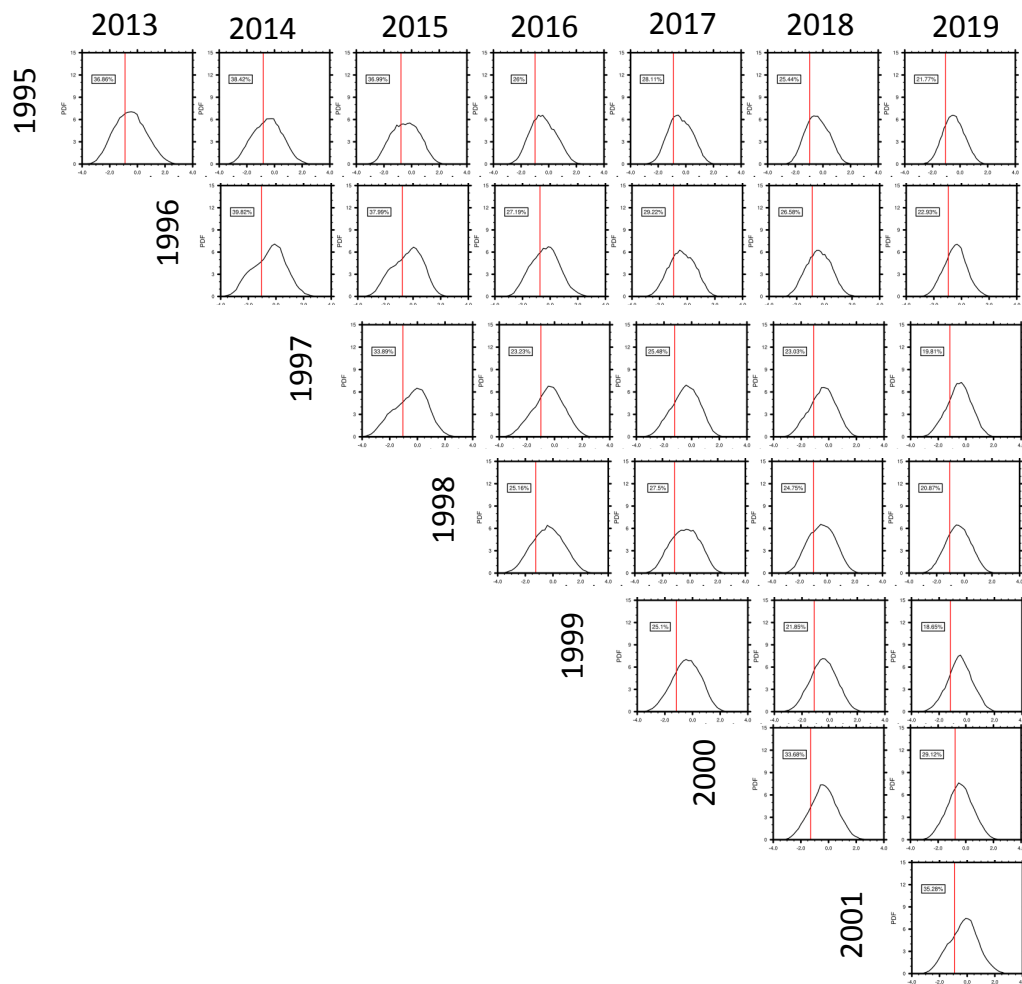

**Figure S1.** Probability distribution function (PDF) of the models' LS tropical ozone trend (20°S-20°N, 30-100 hPa) as function of different periods. In all panels the x-coordinate denotes the different end years (2013-2019) and the y-coordinate the different start years (1995-2001). The red line indicates the respective observational ozone trend value. Moreover the probability (in %) of the observational trend lying within the models' distribution is given within each panel.

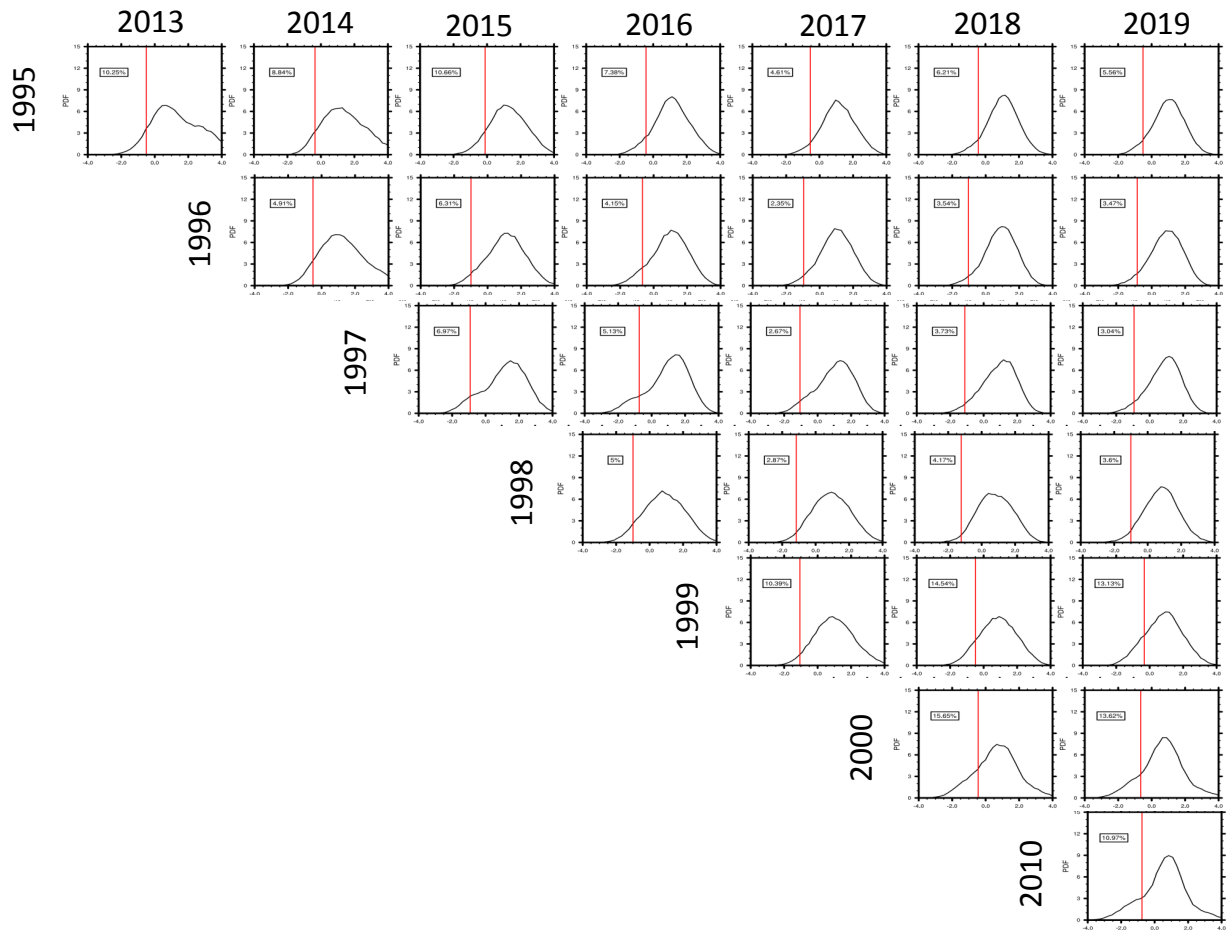

**Figure S2.** Same as Fig. S1, but PDFs for the models' LS northern mid-latitudes ozone trend (30°N-50°N, 30-150 hPa).

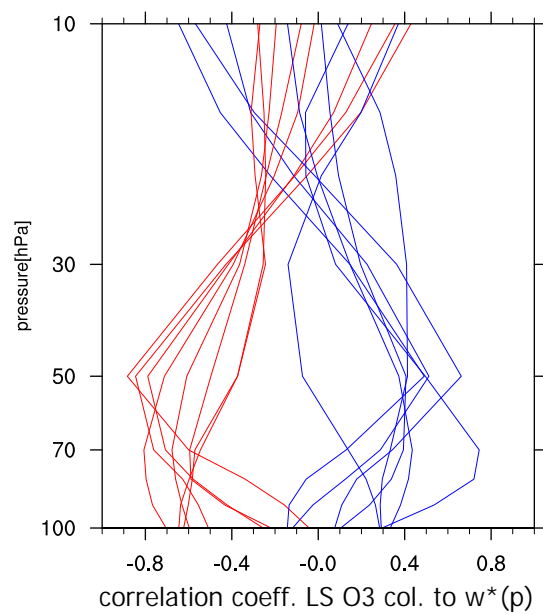

**Figure S3.** Interannual correlation between tropical upwelling (as function of height) and tropical or northernmid-latitude LS ozone column. Correlation profiles are given for the individual CCMs (red for the tropics, blue for the mid-latitudes).
